# Supplementary material for: Removal of albumin and immunoglobulins from canine cerebrospinal fluid using depletion kits: a feasibility study
Source: PubMed Central journal article supplement (PMC4079625; doi:10.1186/2045-8118-11-14), 2014-06-23
Supplement: 2045-8118-11-14-S2.pdf [file 2045-8118-11-14-S2.pdf]

**Additional Table 1: Proteins identified in eluate fractions of different depletion kits**

| <b>Protein</b>                                                                                            | <b>Accession<sup>1</sup></b> | <b>M.W.<sup>2</sup></b> | <b>emPAI<sub>max</sub><sup>3</sup></b> |
|-----------------------------------------------------------------------------------------------------------|------------------------------|-------------------------|----------------------------------------|
| <i>ProteoSeek</i>                                                                                         |                              |                         |                                        |
| Serum albumin precursor [Canis lupus familiaris]                                                          | gi 55742764                  | 69                      | 11.85                                  |
| Hemoglobin subunit beta-like [Canis lupus familiaris]                                                     | gi 399567834                 | 16                      | 6.30                                   |
| PREDICTED: Tetranectin [Canis lupus familiaris]                                                           | gi 545535577                 | 18                      | 4.28                                   |
| PREDICTED: Serum albumin isoform X1 [Canis lupus familiaris]                                              | gi 545520919                 | 69                      | 4.41                                   |
| PREDICTED: Apolipoprotein A-I [Canis lupus familiaris]                                                    | gi 73955106                  | 30                      | 3.34                                   |
| PREDICTED: Apolipoprotein E isoform X5 [Canis lupus familiaris]                                           | gi 545488191                 | 47                      | 3.20                                   |
| Immunoglobulin heavy chain variable region [Mus musculus]                                                 | gi 81237613                  | 13                      | 2.90                                   |
| PREDICTED: Complement component C7 isoform 1 [Canis lupus familiaris]                                     | gi 73953824                  | 95                      | 2.21                                   |
| PREDICTED: Immunoglobulin lambda-like polypeptide 5-like isoform X1 [Canis lupus familiaris]              | gi 545544681                 | 25                      | 2.12                                   |
| Prostaglandin-H2 D-isomerase precursor [Canis lupus familiaris]                                           | gi 50978842                  | 21                      | 2.08                                   |
| Hemoglobin subunit alpha [Canis lupus familiaris]                                                         | gi 44888810                  | 15                      | 1.96                                   |
| PREDICTED: Immunoglobulin lambda-like polypeptide 5-like isoform X2 [Canis lupus familiaris]              | gi 545544683                 | 25                      | 1.77                                   |
| PREDICTED: Gelsolin [Canis lupus familiaris]                                                              | gi 545518174                 | 94                      | 1.70                                   |
| PREDICTED: Fibulin-1 isoform X1 [Canis lupus familiaris]                                                  | gi 545514459                 | 78                      | 1.63                                   |
| Immunoglobulin gamma heavy chain A [Canis lupus familiaris]                                               | gi 17066524                  | 52                      | 1.63                                   |
| Immunoglobulin gamma heavy chain B [Canis lupus familiaris]                                               | gi 17066526                  | 52                      | 1.61                                   |
| PREDICTED: EGF containing fibulin-like extracellular matrix protein 1 isoform X3 [Canis lupus familiaris] | gi 57092953                  | 55                      | 1.60                                   |
| PREDICTED: Angiotensinogen [Canis lupus familiaris]                                                       | gi 545494757                 | 52                      | 1.53                                   |
| Immunoglobulin heavy chain constant region CH2 [Canis lupus familiaris]                                   | gi 124390009                 | 12                      | 1.45                                   |
| Ig heavy chain V region GOM [Canis lupus familiaris]                                                      | gi 123768                    | 12                      | 1.37                                   |
| Immunoglobulin heavy chain constant region CH4 [Canis lupus familiaris]                                   | gi 124390013                 | 14                      | 1.21                                   |
| PREDICTED: LOW QUALITY PROTEIN: Serotransferrin isoform 1 [Canis lupus familiaris]                        | gi 545539001                 | 85                      | 1.16                                   |
| Protease serine 4 isoform B [Homo sapiens]                                                                | gi 33126535                  | 28                      | 1.13                                   |
| Clusterin precursor [Canis lupus familiaris]                                                              | gi 50979240                  | 52                      | 1.08                                   |
| PREDICTED: Plasminogen isoform X1 [Canis lupus familiaris]                                                | gi 545485785                 | 91                      | 1.06                                   |
| Immunoglobulin gamma heavy chain D [Canis lupus familiaris]                                               | gi 17066530                  | 51                      | 0.99                                   |
| EGF-containing fibulin-like extracellular matrix protein 2 precursor [Bos taurus]                         | gi 115496928                 | 50                      | 0.96                                   |
| beta-2-Glycoprotein 1 precursor [Canis lupus familiaris]                                                  | gi 54792721                  | 38                      | 0.90                                   |
| PREDICTED: Fetuin-B [Canis lupus familiaris]                                                              | gi 74003556                  | 42                      | 0.84                                   |
| PREDICTED: alpha-2-HS-Glycoprotein [Canis lupus familiaris]                                               | gi 545553759                 | 39                      | 0.82                                   |
| Kallikrein-6 precursor [Canis lupus familiaris]                                                           | gi 308210822                 | 27                      | 0.67                                   |

|                                                                                                                        |              |     |      |
|------------------------------------------------------------------------------------------------------------------------|--------------|-----|------|
| PREDICTED: Transthyretin isoform 2 [Canis lupus familiaris]                                                            | gi 57089193  | 16  | 0.66 |
| PREDICTED: Apolipoprotein A-I [Felis catus]                                                                            | gi 410972113 | 30  | 0.59 |
| PREDICTED: Antithrombin-III isoform 1 [Canis lupus familiaris]                                                         | gi 359320010 | 52  | 0.57 |
| Pigment epithelium-derived factor [Canis lupus familiaris]                                                             | gi 119637837 | 44  | 0.53 |
| Serpin peptidase inhibitor, clade A (alpha-1 antiproteinase, antitrypsin), member 1 precursor [Canis lupus familiaris] | gi 121583756 | 46  | 0.53 |
| PREDICTED: WAP, Kazal, immunoglobulin, Kunitz and NTR domain-containing protein 2 isoform 1 [Canis lupus familiaris]   | gi 73966420  | 63  | 0.51 |
| PREDICTED: Procollagen C-endopeptidase enhancer 1 isoform 3 [Canis lupus familiaris]                                   | gi 73957867  | 49  | 0.46 |
| IgA heavy chain constant region [Canis lupus familiaris]                                                               | gi 598107    | 37  | 0.45 |
| Immunoglobulin heavy chain V region [Canis lupus familiaris]                                                           | gi 124389941 | 15  | 0.42 |
| Hypothetical protein PANDA_009779 [Ailuropoda melanoleuca]                                                             | gi 281354297 | 68  | 0.41 |
| PREDICTED: Fibulin-5 isoformX1 [Sus scrofa]                                                                            | gi 194038270 | 50  | 0.41 |
| Apolipoprotein E [Canis lupus familiaris]                                                                              | gi 3915605   | 35  | 0.39 |
| Ig heavy chain V region MOO [Canis lupus familiaris]                                                                   | gi 123774    | 13  | 0.36 |
| PREDICTED: Complement factor B [Canis lupus familiaris]                                                                | gi 345778397 | 86  | 0.34 |
| PREDICTED: Complement factor D isoform X2 [Canis lupus familiaris]                                                     | gi 359322165 | 28  | 0.33 |
| PREDICTED: Serum albumin-like isoform 1 [Ailuropoda melanoleuca]                                                       | gi 301786252 | 69  | 0.32 |
| PREDICTED: N-acetyllactosaminide beta-1,3-N-acetylglucosaminyltransferase [Canis lupus familiaris]                     | gi 545530694 | 47  | 0.32 |
| PREDICTED: Complement C3 [Canis lupus familiaris]                                                                      | gi 545535669 | 180 | 0.32 |
| Carbonic anhydrase 2 [Canis lupus familiaris]                                                                          | gi 223556019 | 29  | 0.30 |
| PREDICTED: Complement C4-A [Canis lupus familiaris]                                                                    | gi 545520262 | 193 | 0.29 |
| Immunoglobulin gamma heavy chain C [Canis lupus familiaris]                                                            | gi 17066528  | 52  | 0.29 |
| PREDICTED: Vitamin D-binding protein isoformX2 [Canis lupus familiaris]                                                | gi 73975215  | 53  | 0.28 |
| PREDICTED: Uncharacterized protein LOC100855594 [Canis lupus familiaris]                                               | gi 545544650 | 33  | 0.28 |
| PREDICTED: Insulin-like growth factor binding protein 7 isoform 1 [Canis lupus familiaris]                             | gi 73975083  | 29  | 0.28 |
| PREDICTED: Ectonucleotide pyrophosphatase/phosphodiesterase family member 2 isoform X8 [Canis lupus familiaris]        | gi 545520671 | 109 | 0.28 |
| PREDICTED: Kininogen-1 isoform X3 [Canis lupus familiaris]                                                             | gi 545553768 | 44  | 0.28 |
| Albumin precursor [Capra hircus]                                                                                       | gi 193085052 | 66  | 0.27 |
| Serum albumin precursor [Bos taurus]                                                                                   | gi 30794280  | 69  | 0.27 |
| PREDICTED: Fibrinogen beta chain isoform X3 [Canis lupus familiaris]                                                   | gi 545524893 | 56  | 0.26 |
| PREDICTED: Plasma serine protease inhibitor isoform X3 [Canis lupus familiaris]                                        | gi 57090343  | 46  | 0.25 |
| PREDICTED: Histidine-rich glycoprotein isoform X1 [Canis lupus familiaris]                                             | gi 545553762 | 62  | 0.25 |
| PREDICTED: Insulin-like growth factor binding protein 6 isoform 3 [Canis lupus familiaris]                             | gi 73996265  | 25  | 0.23 |
| PREDICTED: Kininogen-1 isoformX2 [Canis lupus familiaris]                                                              | gi 57109938  | 48  | 0.23 |
| PREDICTED: LOW QUALITY PROTEIN: Extracellular matrix protein 1 [Canis lupus familiaris]                                | gi 345782613 | 61  | 0.23 |
| PREDICTED: Ig lambda chain V-I region BL2 [Canis lupus familiaris]                                                     | gi 545544658 | 15  | 0.21 |
| Ig heavy chain variable region, VH3 family [Homo sapiens]                                                              | gi 33319320  | 13  | 0.21 |

|                                                                                                |              |     |      |
|------------------------------------------------------------------------------------------------|--------------|-----|------|
| Immunoglobulin heavy chain variable region [Mus musculus]                                      | gi 81237613  | 13  | 0.21 |
| PREDICTED: Neuronal pentraxin-1 [Canis lupus familiaris]                                       | gi 73964857  | 47  | 0.21 |
| PREDICTED: Ganglioside GM2 activator [Canis lupus familiaris]                                  | gi 359319344 | 22  | 0.21 |
| PREDICTED: alpha-1B-Glycoprotein [Canis lupus familiaris]                                      | gi 545487024 | 61  | 0.20 |
| Immunoglobulin light chain variable region [Homo sapiens]                                      | gi 37694643  | 12  | 0.20 |
| PREDICTED: Cystatin-C-like [Canis lupus familiaris]                                            | gi 359322597 | 16  | 0.20 |
| PREDICTED: Fibrinogen gamma chain isoform X2 [Canis lupus familiaris]                          | gi 545524897 | 50  | 0.19 |
| PREDICTED: Complement C1r subcomponent isoform X2 [Canis lupus familiaris]                     | gi 545546515 | 81  | 0.18 |
| Albumin, isoform CRA_h [Homo sapiens]                                                          | gi 119626071 | 69  | 0.18 |
| PREDICTED: Lumican [Odobenus rosmarus divergens]                                               | gi 472392679 | 38  | 0.18 |
| PREDICTED: alpha-1-Antichymotrypsin isoform X2 [Canis lupus familiaris]                        | gi 73964432  | 47  | 0.17 |
| Immunoglobulin lambda light chain variable region [Canis lupus familiaris]                     | gi 164430480 | 13  | 0.15 |
| PREDICTED: Soluble calcium-activated nucleotidase 1 isoform X1 [Canis lupus familiaris]        | gi 545509197 | 94  | 0.15 |
| PREDICTED: Dihydropyrimidinase-related protein 2 isoform 2 [Macaca mulatta]                    | gi 109085951 | 74  | 0.14 |
| PREDICTED: Calsyntenin-1 [Jaculus jaculus]                                                     | gi 507547113 | 108 | 0.14 |
| PREDICTED: N-Acetyllactosaminide beta-1,3-N-acetylglucosaminyltransferase [Sus scrofa]         | gi 311247200 | 47  | 0.14 |
| Anti-quaternary epitope monoclonal antibody light chain [Macaca mulatta]                       | gi 325152604 | 15  | 0.14 |
| PREDICTED: Vitamin K-dependent protein S [Canis lupus familiaris]                              | gi 545552717 | 117 | 0.13 |
| PREDICTED: alpha-Enolase [Trichechus manatus latirostris]                                      | gi 471407206 | 47  | 0.11 |
| PREDICTED: Uncharacterized protein LOC612122 [Canis lupus familiaris]                          | gi 545544656 | 29  | 0.10 |
| Carbonic anhydrase 1 [Canis lupus familiaris]                                                  | gi 223556021 | 29  | 0.10 |
| Unnamed protein product [Mus musculus]                                                         | gi 12846758  | 50  | 0.10 |
| PREDICTED: Vitronectin isoform 2 [Canis lupus familiaris]                                      | gi 73966959  | 54  | 0.09 |
| PREDICTED: LOW QUALITY PROTEIN: Monocyte differentiation antigen CD14 [Canis lupus familiaris] | gi 345794218 | 40  | 0.09 |
| PREDICTED: Neural cell adhesion molecule 2 [Canis lupus familiaris]                            | gi 545550881 | 93  | 0.09 |
| PREDICTED: Complement C1q subcomponent subunit C isoform 1 [Canis lupus familiaris]            | gi 345793701 | 26  | 0.09 |
| Matrix metalloproteinase-2 [Canis lupus familiaris]                                            | gi 7688731   | 71  | 0.08 |
| Rho GDP-dissociation inhibitor 1 [Bos taurus]                                                  | gi 28603774  | 23  | 0.08 |
| mCG7547, isoform CRA_c [Mus musculus]                                                          | gi 148703743 | 39  | 0.07 |
| PREDICTED: Properdin [Canis lupus familiaris]                                                  | gi 74007356  | 51  | 0.07 |
| PREDICTED: Bisphosphoglycerate mutase isoform X1 [Canis lupus familiaris]                      | gi 545525542 | 30  | 0.06 |
| Ig lambda chain V-I region BL2 precursor-like protein [Camelus ferus]                          | gi 528761490 | 32  | 0.06 |
| PREDICTED: Hyaluronan-binding protein 2 [Canis lupus familiaris]                               | gi 545547980 | 62  | 0.06 |
| PREDICTED: Corticosteroid-binding globulin isoform X2 [Canis lupus familiaris]                 | gi 73964415  | 45  | 0.05 |
| Olfactomedin-like protein 3 precursor [Bos taurus]                                             | gi 115497736 | 46  | 0.05 |
| PREDICTED: Serum albumin [Gorilla gorilla gorilla]                                             | gi 426344604 | 69  | 0.05 |

|                                                                              |              |     |      |
|------------------------------------------------------------------------------|--------------|-----|------|
| PREDICTED: Contactin-1 isoform 12 [Pan troglodytes]                          | gi 114645302 | 113 | 0.05 |
| GDP dissociation inhibitor 2, isoform CRA_a [Homo sapiens]                   | gi 119606836 | 48  | 0.05 |
| PREDICTED: LOW QUALITY PROTEIN: Brevican core protein [Equus caballus]       | gi 545216545 | 99  | 0.05 |
| PREDICTED: Hyaluronidase-1 isoform X3 [Canis lupus familiaris]               | gi 545533633 | 53  | 0.04 |
| PREDICTED: alpha-2-Antiplasmin isoform X3 [Canis lupus familiaris]           | gi 545512145 | 62  | 0.04 |
| Hypothetical protein PANDA_005179 [Ailuropoda melanoleuca]                   | gi 281348494 | 66  | 0.04 |
| PREDICTED: Complement factor I isoform X4 [Canis lupus familiaris]           | gi 545552242 | 67  | 0.03 |
| PREDICTED: Phospholipid transfer protein isoform X4 [Canis lupus familiaris] | gi 545540927 | 61  | 0.02 |
| PREDICTED: Transketolase isoform 1 [Odobenus rosmarus divergens]             | gi 472384275 | 68  | 0.02 |
| PREDICTED: Fibrinogen alpha chain [Canis lupus familiaris]                   | gi 73978329  | 97  | 0.01 |
| Collagen alpha-1(XVIII) chain precursor [Bos taurus]                         | gi 134085613 | 154 | 0.01 |
| PREDICTED: Coagulation factor V isoform X1 [Canis lupus familiaris]          | gi 345803274 | 250 | 0.01 |

### ***VivaPure***

|                                                                                              |              |    |       |
|----------------------------------------------------------------------------------------------|--------------|----|-------|
| Serum albumin precursor [Canis lupus familiaris]                                             | gi 55742764  | 69 | 11.30 |
| Hemoglobin subunit beta-like [Canis lupus familiaris]                                        | gi 399567834 | 16 | 5.69  |
| PREDICTED: Apolipoprotein A-I [Canis lupus familiaris]                                       | gi 73955106  | 30 | 4.80  |
| PREDICTED: Angiotensinogen [Canis lupus familiaris]                                          | gi 545494757 | 52 | 3.35  |
| PREDICTED: Serum albumin isoform X1 [Canis lupus familiaris]                                 | gi 545520919 | 69 | 2.98  |
| Hemoglobin subunit alpha [Canis lupus familiaris]                                            | gi 44888810  | 15 | 2.91  |
| Immunoglobulin gamma heavy chain B [Canis lupus familiaris]                                  | gi 17066526  | 52 | 2.58  |
| PREDICTED: Immunoglobulin lambda-like polypeptide 5-like isoform X1 [Canis lupus familiaris] | gi 545544681 | 25 | 1.62  |
| PREDICTED: Immunoglobulin lambda-like polypeptide 5-like isoform X2 [Canis lupus familiaris] | gi 545544683 | 25 | 1.62  |
| Prostaglandin-H2 D-isomerase precursor [Canis lupus familiaris]                              | gi 50978842  | 21 | 1.33  |
| Albumin, isoform CRA_h [Homo sapiens]                                                        | gi 119626071 | 69 | 1.21  |
| Immunoglobulin heavy chain constant region CH2 [Canis lupus familiaris]                      | gi 124390009 | 12 | 1.18  |
| Immunoglobulin gamma heavy chain A [Canis lupus familiaris]                                  | gi 17066524  | 52 | 1.16  |
| beta-2-Glycoprotein 1 precursor [Canis lupus familiaris]                                     | gi 54792721  | 38 | 1.00  |
| PREDICTED: Gelsolin [Canis lupus familiaris]                                                 | gi 545518174 | 94 | 0.96  |
| PREDICTED: Fibulin-1 isoform X1 [Canis lupus familiaris]                                     | gi 545514459 | 78 | 0.86  |
| Immunoglobulin heavy chain constant region CH4 [Canis lupus familiaris]                      | gi 124390013 | 14 | 0.85  |
| PREDICTED: alpha-2-HS-Glycoprotein [Canis lupus familiaris]                                  | gi 545553759 | 39 | 0.84  |
| Immunoglobulin gamma heavy chain C [Canis lupus familiaris]                                  | gi 17066528  | 52 | 0.67  |
| Clusterin precursor [Canis lupus familiaris]                                                 | gi 50979240  | 52 | 0.67  |
| PREDICTED: LOW QUALITY PROTEIN: Serotransferrin isoform 1 [Canis lupus familiaris]           | gi 545539001 | 85 | 0.65  |
| Apolipoprotein E [Canis lupus familiaris]                                                    | gi 3915605   | 35 | 0.65  |

|                                                                                                                        |              |     |      |
|------------------------------------------------------------------------------------------------------------------------|--------------|-----|------|
| PREDICTED: Apolipoprotein E isoform X5 [Canis lupus familiaris]                                                        | gi 545488191 | 47  | 0.65 |
| PREDICTED: Serum albumin-like isoform 1 [Ailuropoda melanoleuca]                                                       | gi 301786252 | 69  | 0.64 |
| Serpin peptidase inhibitor, clade A (alpha-1 antiproteinase, antitrypsin), member 1 precursor [Canis lupus familiaris] | gi 121583756 | 46  | 0.57 |
| PREDICTED: Vitamin D-binding protein isoformX2 [Canis lupus familiaris]                                                | gi 73975215  | 53  | 0.53 |
| PREDICTED: Tetranectin [Canis lupus familiaris]                                                                        | gi 545535577 | 18  | 0.48 |
| PREDICTED: Procollagen C-endopeptidase enhancer 1 isoform 3 [Canis lupus familiaris]                                   | gi 73957867  | 49  | 0.45 |
| Immunoglobulin gamma heavy chain D [Canis lupus familiaris]                                                            | gi 17066530  | 51  | 0.42 |
| PREDICTED: Antithrombin-III isoform 1 [Canis lupus familiaris]                                                         | gi 359320010 | 52  | 0.42 |
| Ig heavy chain V region GOM [Canis lupus familiaris]                                                                   | gi 123768    | 12  | 0.41 |
| PREDICTED: EGF containing fibulin-like extracellular matrix protein 1 isoform X3 [Canis lupus familiaris]              | gi 57092953  | 55  | 0.33 |
| Albumin precursor [Capra hircus]                                                                                       | gi 193085052 | 66  | 0.30 |
| PREDICTED: Complement C3 [Canis lupus familiaris]                                                                      | gi 545535669 | 180 | 0.25 |
| PREDICTED: Complement component C7 isoform 1 [Canis lupus familiaris]                                                  | gi 73953824  | 95  | 0.22 |
| Dickkopf-related protein 3 precursor [Canis lupus familiaris]                                                          | gi 548923814 | 38  | 0.22 |
| PREDICTED: Complement C4-A [Canis lupus familiaris]                                                                    | gi 545520262 | 193 | 0.22 |
| PREDICTED: Calsyntenin-1 [Jaculus jaculus]                                                                             | gi 507547113 | 108 | 0.22 |
| PREDICTED: Plexin domain-containing protein 2 isoform 2 [Pan troglodytes]                                              | gi 114629664 | 60  | 0.21 |
| Hypothetical protein PANDA_009779 [Ailuropoda melanoleuca]                                                             | gi 281354297 | 68  | 0.18 |
| PREDICTED: alpha-1-Antichymotrypsin isoform X2 [Canis lupus familiaris]                                                | gi 73964432  | 47  | 0.18 |
| Kallikrein-6 precursor [Canis lupus familiaris]                                                                        | gi 308210822 | 27  | 0.18 |
| Carbonic anhydrase 2 [Canis lupus familiaris]                                                                          | gi 223556019 | 29  | 0.16 |
| PREDICTED: Vitamin K-dependent protein S [Canis lupus familiaris]                                                      | gi 545552717 | 117 | 0.16 |
| PREDICTED: Uncharacterized protein LOC100855594 [Canis lupus familiaris]                                               | gi 545544650 | 33  | 0.14 |
| Immunoglobulin light chain variable region [Homo sapiens]                                                              | gi 37694643  | 12  | 0.14 |
| PREDICTED: Complement C1q subcomponent subunit C isoform 1 [Canis lupus familiaris]                                    | gi 345793701 | 26  | 0.13 |
| PREDICTED: Serum albumin [Gorilla gorilla gorilla]                                                                     | gi 426344604 | 69  | 0.13 |
| PREDICTED: alpha-1B-Glycoprotein [Canis lupus familiaris]                                                              | gi 545487024 | 61  | 0.12 |
| PREDICTED: Fetuin-B [Canis lupus familiaris]                                                                           | gi 74003556  | 42  | 0.12 |
| PREDICTED: Uncharacterized protein LOC612122 [Canis lupus familiaris]                                                  | gi 545544656 | 29  | 0.12 |
| PREDICTED: Vitronectin isoform 2 [Canis lupus familiaris]                                                              | gi 73966959  | 54  | 0.11 |
| PREDICTED: Transthyretin isoform 2 [Canis lupus familiaris]                                                            | gi 57089193  | 16  | 0.10 |
| PREDICTED: Fibrinogen beta chain isoform X3 [Canis lupus familiaris]                                                   | gi 545524893 | 56  | 0.09 |
| PREDICTED: Kininogen-1 isoformX2 [Canis lupus familiaris]                                                              | gi 57109938  | 48  | 0.09 |
| IgA heavy chain constant region [Canis lupus familiaris]                                                               | gi 598107    | 37  | 0.07 |
| PREDICTED: alpha-2-Antiplasmin isoform X3 [Canis lupus familiaris]                                                     | gi 545512145 | 62  | 0.07 |
| PREDICTED: Insulin-like growth factor binding protein 6 isoform 3 [Canis lupus familiaris]                             | gi 73996265  | 25  | 0.06 |

|                                                                                                    |              |    |      |
|----------------------------------------------------------------------------------------------------|--------------|----|------|
| PREDICTED: Complement factor D isoform X2 [Canis lupus familiaris]                                 | gi 359322165 | 28 | 0.06 |
| PREDICTED: N-Acetyllactosaminide beta-1,3-N-acetylglucosaminyltransferase [Canis lupus familiaris] | gi 545530694 | 47 | 0.05 |
| EGF-containing fibulin-like extracellular matrix protein 2 precursor [Bos taurus]                  | gi 115496928 | 50 | 0.05 |
| Protease serine 4 isoform B [Homo sapiens]                                                         | gi 33126535  | 28 | 0.05 |
| mCG7547, isoform CRA_c [Mus musculus]                                                              | gi 148703743 | 39 | 0.04 |
| PREDICTED: Hyaluronan-binding protein 2 [Canis lupus familiaris]                                   | gi 545547980 | 62 | 0.03 |

***ProteoExtract***

|                                                           |             |    |      |
|-----------------------------------------------------------|-------------|----|------|
| Immunoglobulin heavy chain variable region [Mus musculus] | gi 81237613 | 13 | 2.39 |
| Hemoglobin subunit alpha [Canis lupus familiaris]         | gi 44888810 | 15 | 1.64 |
| Serum albumin precursor [Bos taurus]                      | gi 30794280 | 69 | 0.64 |

<sup>1</sup> Accession number in NCBI database

<sup>2</sup> Molecular weight [kDa]

<sup>3</sup> The emPAI value expresses mass spectrometry-based quantitation of protein abundance and is calculated according to [http://www.matrixscience.com/help/quant\\_empai\\_help.html](http://www.matrixscience.com/help/quant_empai_help.html) .
